# Supplementary material for: Efficient hole-conductor-free, fully printable mesoscopic perovskite solar cells with a broad light harvester NH2CHNH2PbI3
Source: Royal Society of Chemistry journal article supplement (doi:10.1039/c4ta03741c), 2014-01-01
Supplement: c4ta03741c1.pdf [file c4ta03741c1.pdf]

**Electronic Supplementary Information For**  
**Efficient Hole-Conductor-Free, Fully Printable Mesoscopic**  
**Perovskite Solar Cell with a Broad Light Harvester**  
 **$\text{NH}_2\text{CH}=\text{NH}_2\text{PbI}_3$**

Min Hu, Linfeng Liu, Anyi Mei, Ying Yang, Tongfa Liu, Hongwei Han\*

*Michael Grätzel Center for Mesoscopic Solar cells, Wuhan National Laboratory for Optoelectronics, School of Optical and Electronic Information, Huazhong University of Science and Technology, Wuhan, Hubei, P.R. China, 430074.*

*E-mail: [hongwei.han@mail.hust.edu.cn](mailto:hongwei.han@mail.hust.edu.cn);*

*Tel: +86 27 8779 3027*

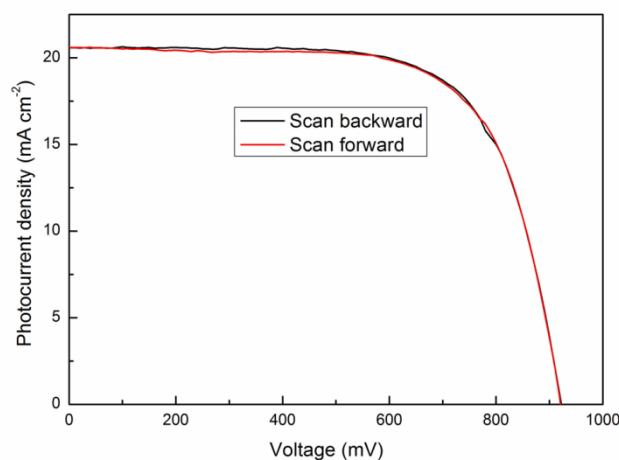

**Figure S1** J-V curves of hole-conductor-free mesoscopic solar cell based on  $(\text{FA})_{0.6}(\text{MA})_{0.4}\text{PbI}_3$  at different scanning directions: starting from 0 V to  $V_{OC}$  (backward) and starting from  $V_{OC}$  to 0 V (forward), the scan rate is  $250 \text{ mV s}^{-1}$ .

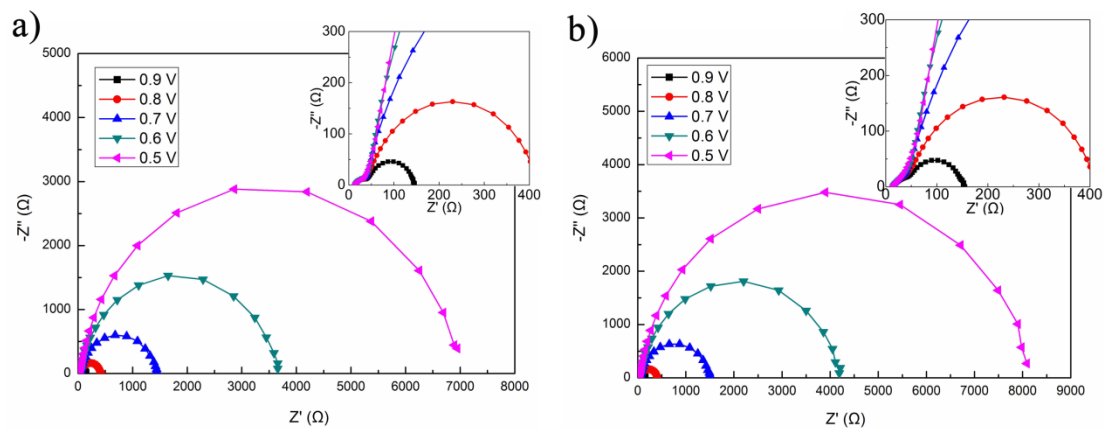

**Figure S2** Nyquist plots of hole-conductor-free mesoscopic solar cells based on (a) FAPbI<sub>3</sub>, (b) (FA)<sub>0.6</sub>(MA)<sub>0.4</sub>PbI<sub>3</sub> measured in dark condition with different forward applied bias. The inset is a zoom of the low impedance region.
